# Supplementary material
Source: publisher figshare collection journal article supplement (https://acs.figshare.com/ndownloader/files/11659229)
Supplement: Supplementary file 1 [file 11659229]

## Supporting Information

### A SnO<sub>2</sub>/Reduced Graphene Oxide Interlayer Mitigating Shuttle Effect of Li-S Batteries

Nana Hu,<sup>a</sup> Xingshuai Lv,<sup>b</sup> Ying Dai,<sup>b</sup> Linlin Fan,<sup>c</sup> Dongbin Xiong<sup>c</sup> and Xifei Li<sup>a c\*</sup>

<sup>a</sup>Tianjin International Joint Research Centre of Surface Technology for Energy Storage Materials, College of Physics and Materials Science, Tianjin Normal University, Tianjin 300387, China

E-mail: [xfli2011@hotmail.com](mailto:xfli2011@hotmail.com)

<sup>b</sup>School of Physics, State Key Laboratory of Crystal Materials, Shandong University, 250100 Jinan, PR China

<sup>c</sup>Institute of Advanced Electrochemical Energy, Xi'an University of Technology, Xi'an 710048, China.

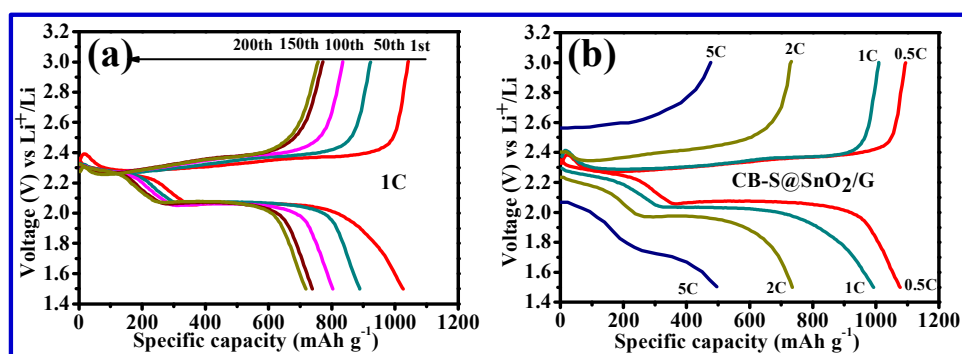

**Figure S1** (a) Typical galvanostatic charge–discharge profiles of the CB-S@SnO<sub>2</sub>/rGO cathode at 1C in different cycles; (b) Galvanostatic charge–discharge profiles of the CB-S@SnO<sub>2</sub>/rGO cathode at various current rate.

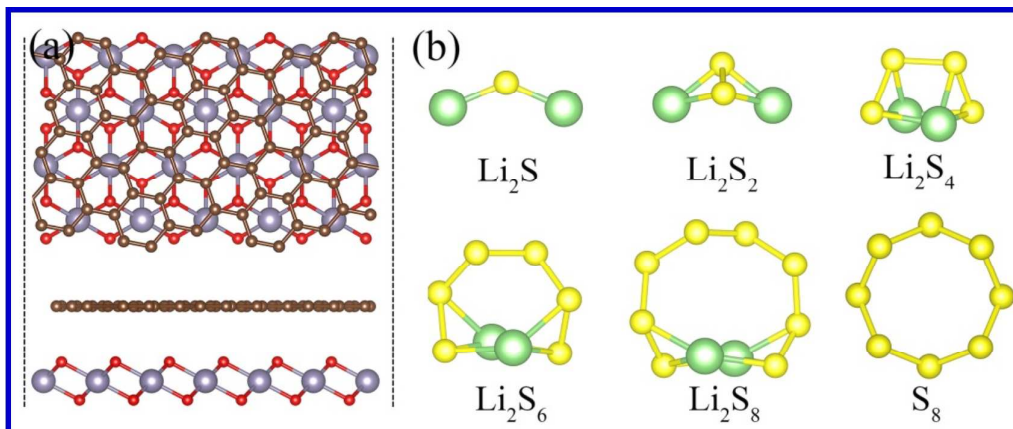

**Figure S2** (a) Top view of fully optimized structure of the SnO<sub>2</sub>/rGO composite; (b) Fully optimized molecular structures of isolated Li<sub>2</sub>S<sub>n</sub> (n=1, 2, 4, 6, 8) and S<sub>8</sub> clusters in the ground states, respectively. Here, the yellow, green, brown, red and gray spheres represent the S, Li, C, O and Sn atoms, respectively.
